# Supplementary material for: A disposable electrochemical sensor based on iron molybdate for the analysis of dopamine in biological samples
Source: Royal Society of Chemistry journal article supplement (doi:10.1039/d1nj01718g), 2021-01-01
Supplement: d1nj01718g1.pdf [file d1nj01718g1.pdf]

**Supplementary Information**

**A Disposable Electrochemical Sensor Based on Iron Molybdate for Analysis of Dopamine in Biological Samples**

Elumalai Ashok Kumar<sup>a,b</sup>, Tse-Wei Chen<sup>c,d,e</sup>, Shen-Ming Chen<sup>c\*</sup>, Tzyy-Jiann Wang<sup>a</sup>, Allen Joseph Anthuvan<sup>f</sup>, Suliman Yousef AlOmar<sup>g</sup>, Naushad Ahmad<sup>h</sup>, Yu-Hsu Chang<sup>b</sup>,

*<sup>a</sup>Department of Electro-Optical Engineering, National Taipei University of Technology, Taipei 106, Taiwan.*

*<sup>b</sup>Department of Materials and Mineral Resources Engineering, Institute of Mineral Resources Engineering, National Taipei University of Technology, Taipei 106, Taiwan.*

*<sup>c</sup>Department of Chemical Engineering and Biotechnology, National Taipei University of Technology, Taipei 106, Taiwan.*

*<sup>d</sup>Research and Development Center for Smart Textile Technology, National Taipei University of Technology, Taipei 106, Taiwan.*

*<sup>e</sup>Department of Materials, Imperial College London, London, SW7 2AZ, United Kingdom.*

*<sup>f</sup>DRDO-Centre for Life Sciences, Bharathiar University, Coimbatore 641 046, India.*

*<sup>g</sup>Doping Research Chair, Zoology Department, College of Science, King Saud University, Kingdom of Saudi Arabia.*

*<sup>h</sup>Chemistry Department, College of Science, King Saud University, Kingdom of Saudi Arabia.*

**Corresponding author**

\*E-mail: [smchen78@ms15.hinet.net](mailto:smchen78@ms15.hinet.net)

Tel: +886 2270 17147, Fax: +886 2270 25238.

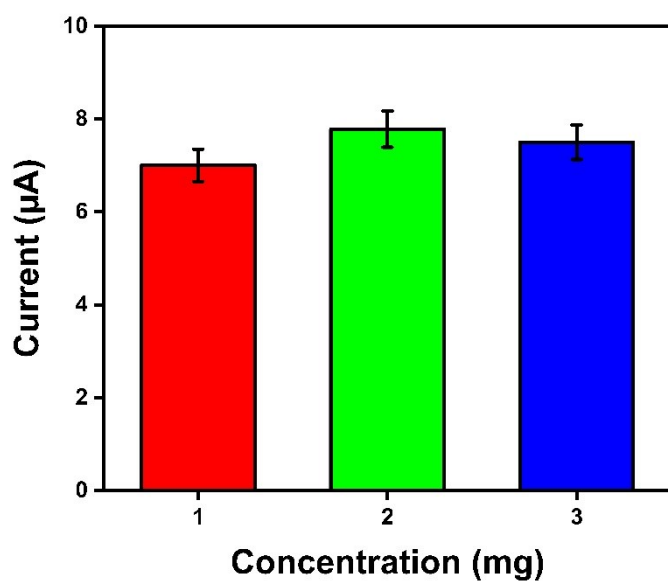

**Fig. S1** CV response for concentration (mg) of the  $\text{Fe}_2(\text{MoO}_4)_3/\text{SPCE}$ .

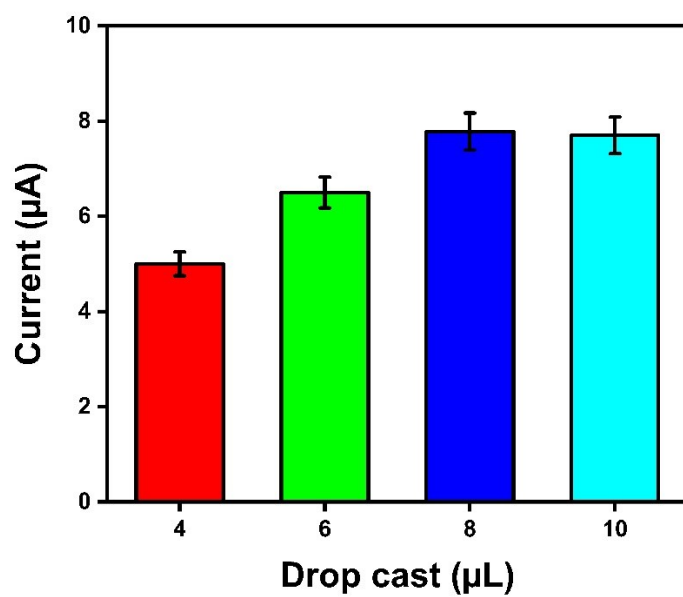

**Fig. S2** CV response for loading amount (μL) of the  $\text{Fe}_2(\text{MoO}_4)_3/\text{SPCE}$ .
